# Supplementary material for: New 30-Noroleanane Triterpenoid Saponins from Holboellia coriacea Diels
Source: MDPI journal article supplement (doi:10.3390/molecules21060734), 2016-06-04
Supplement: s1 [file s1]

# Supplementary Materials: New 30-Noroleanane Triterpenoid Saponins from *Holboellia coriacea* Diels

Wenbing Ding, Ye Li, Guanhua Li, Hualiang He, Zhiwen Li and Youzhi Li

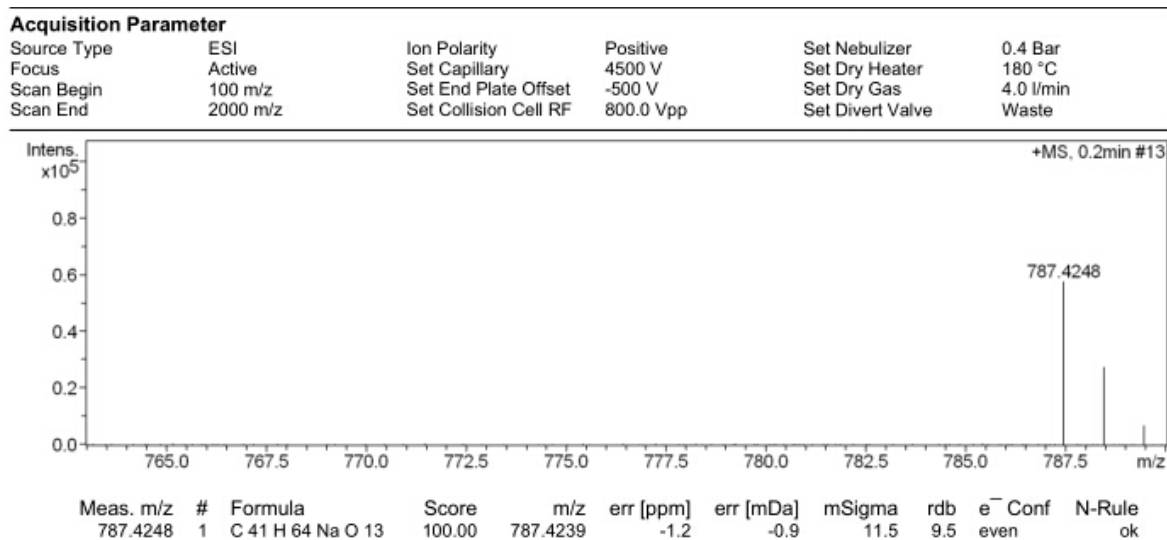

Figure S1. HR-ESIMS of compound 1.

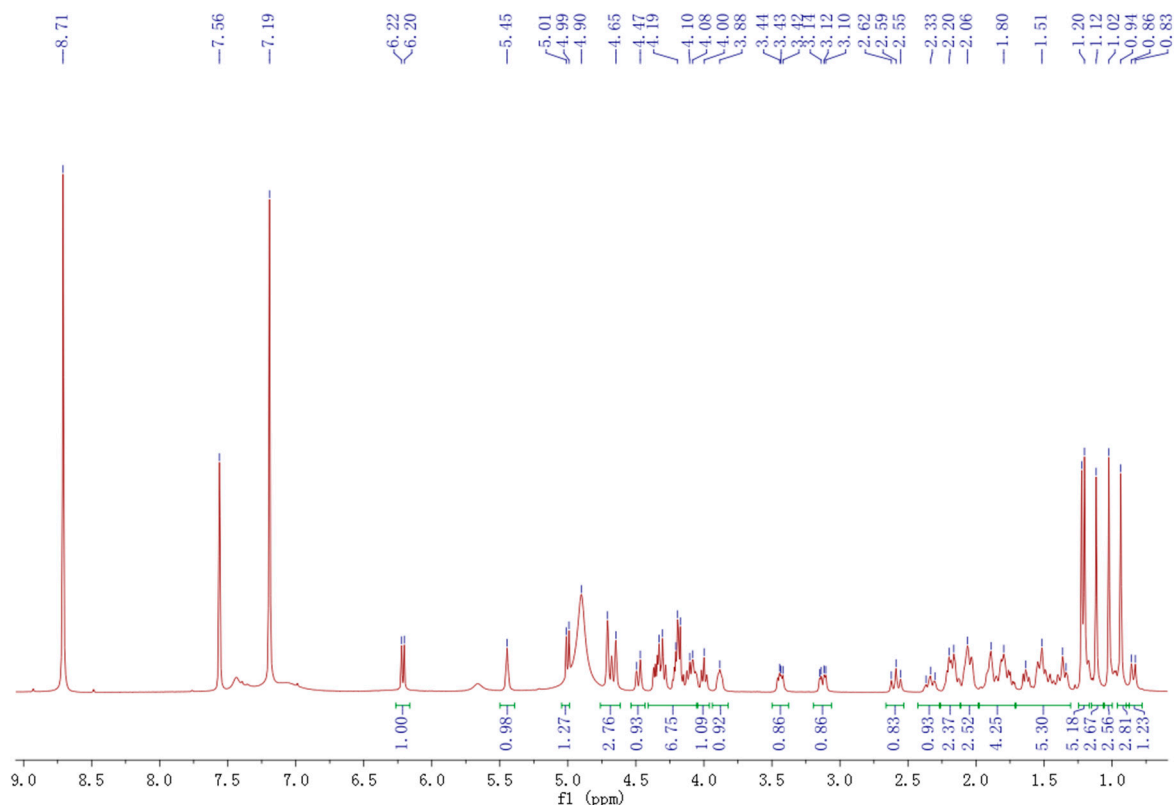

Figure S2. <sup>1</sup>H-NMR of compound 1.

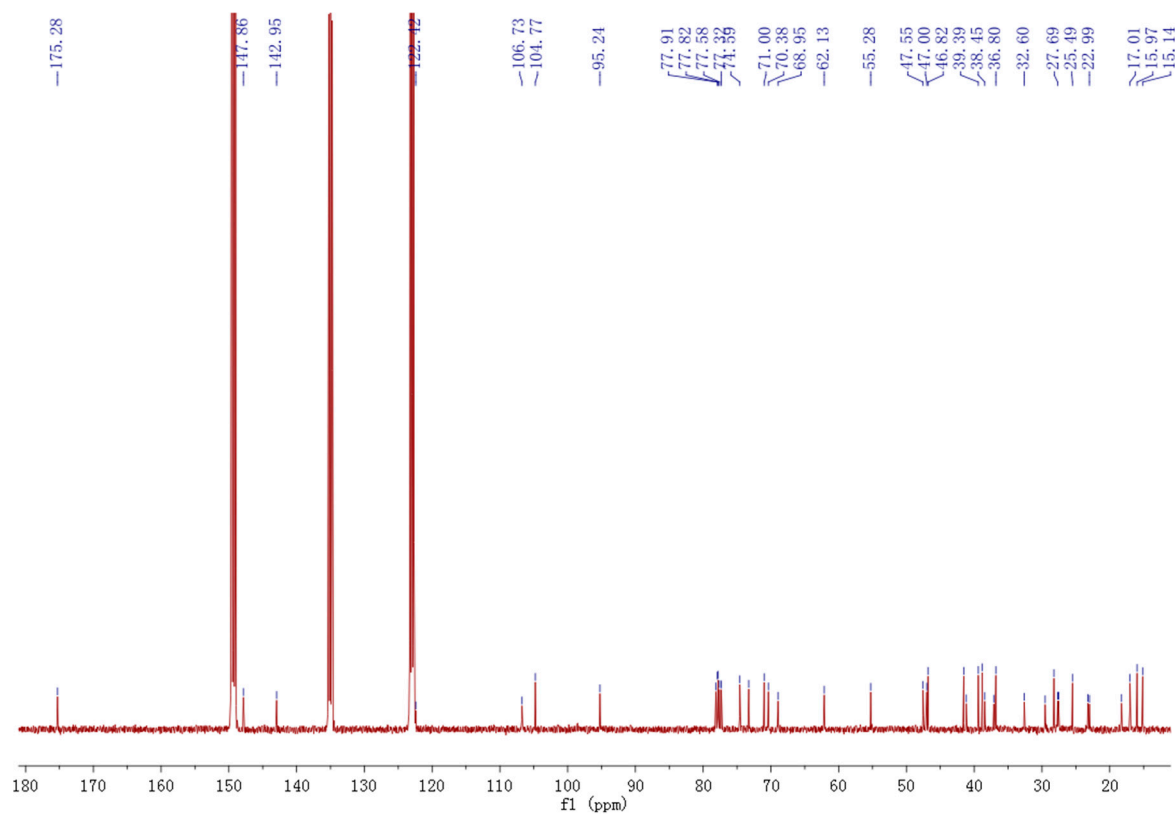Figure S3. <sup>13</sup>C-NMR of compound 1.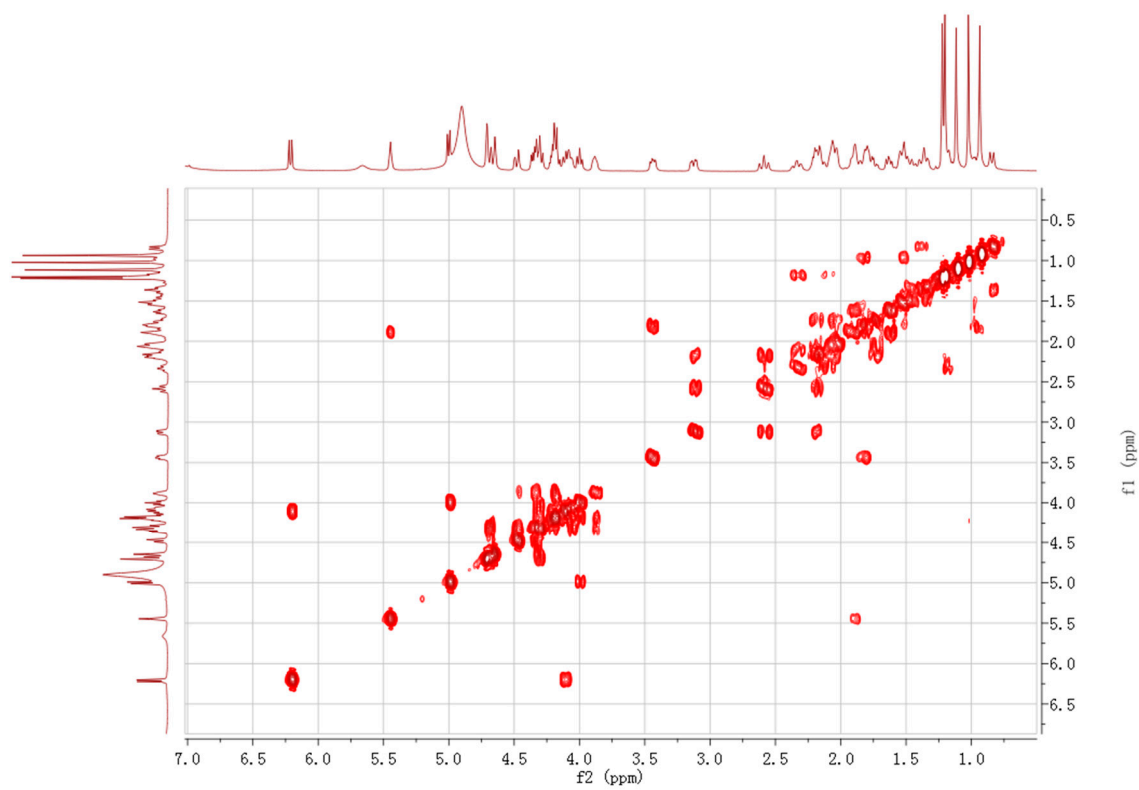Figure S4. <sup>1</sup>H-<sup>1</sup>H COSY of compound 1.

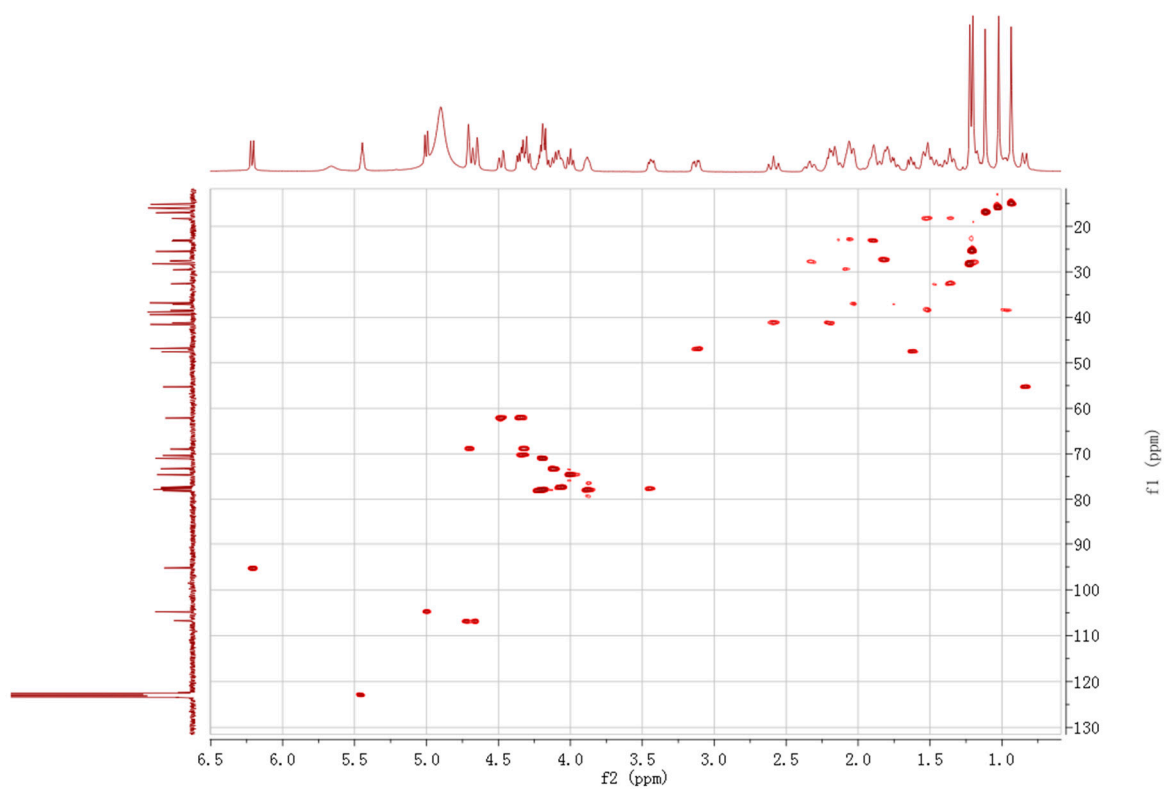

Figure S5. HSQC of compound 1.

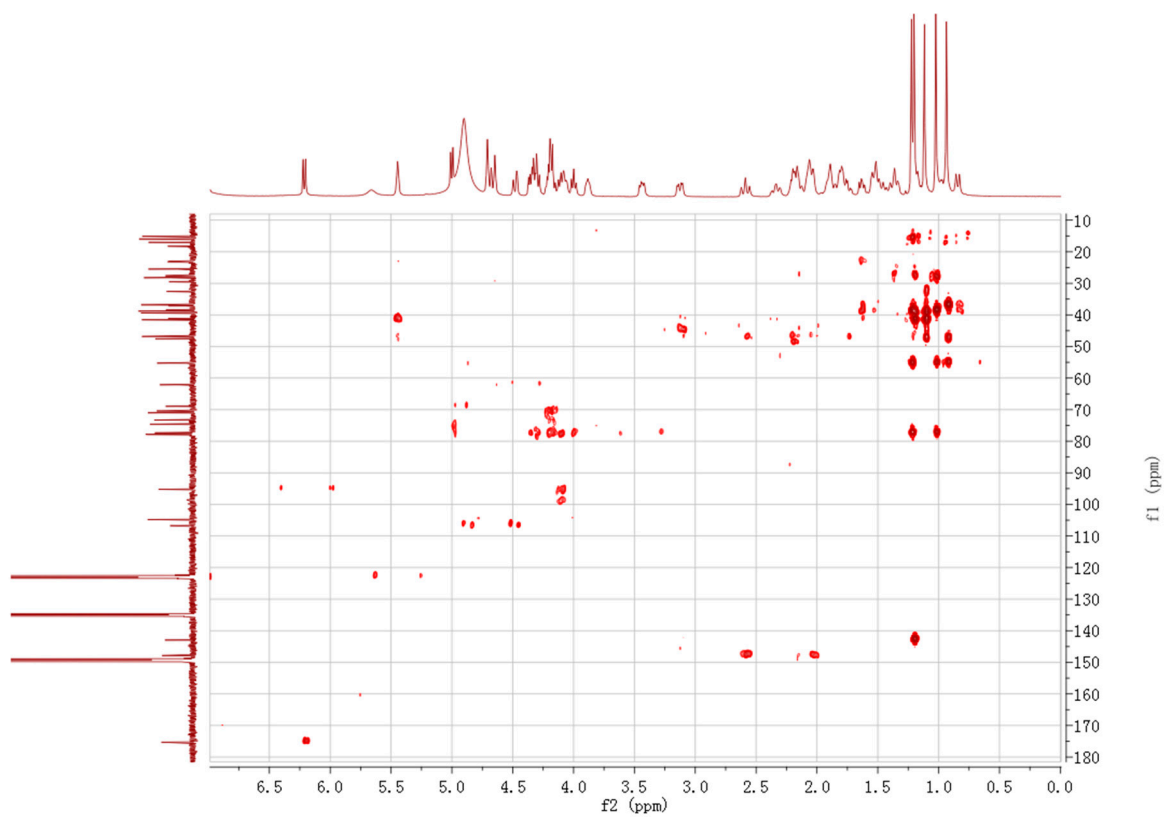

Figure S6. HMBC of compound 1.

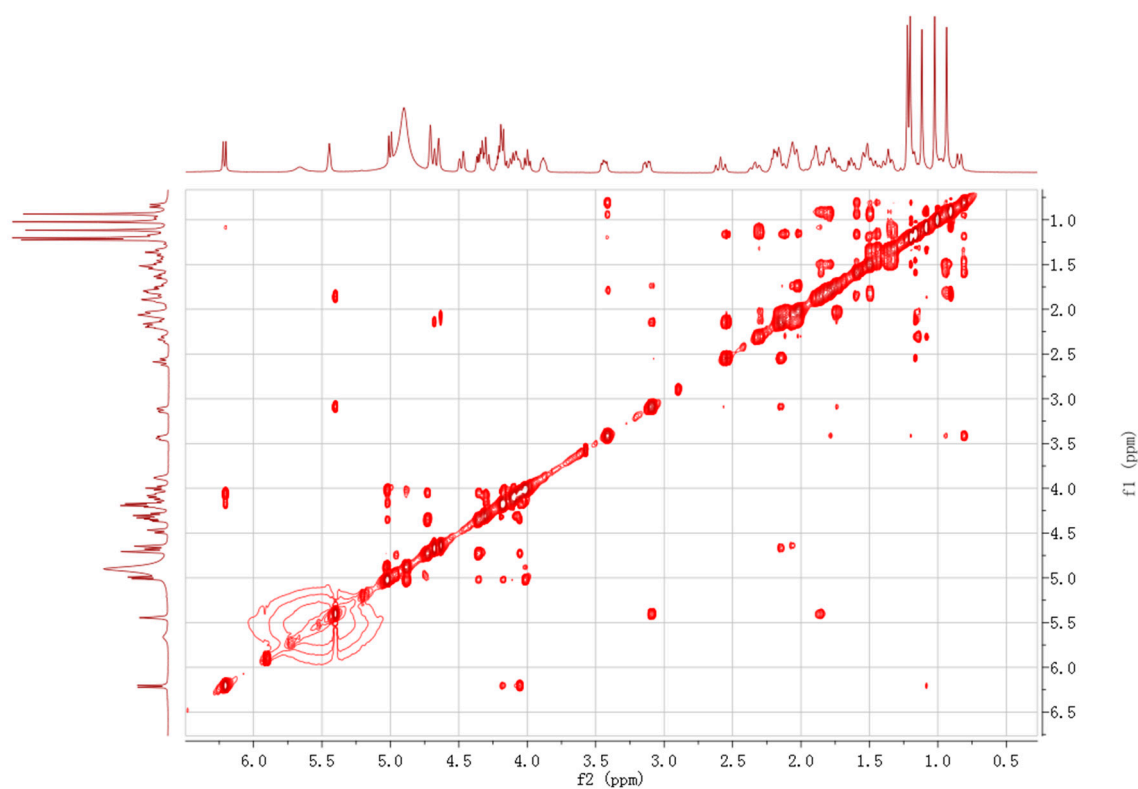

Figure S7. NOESY of compound 1.

**Acquisition Parameter**

|             |          |                       |           |                  |           |
|-------------|----------|-----------------------|-----------|------------------|-----------|
| Source Type | ESI      | Ion Polarity          | Negative  | Set Nebulizer    | 0.4 Bar   |
| Focus       | Active   | Set Capillary         | 3800 V    | Set Dry Heater   | 180 °C    |
| Scan Begin  | 100 m/z  | Set End Plate Offset  | -500 V    | Set Dry Gas      | 4.0 l/min |
| Scan End    | 2000 m/z | Set Collision Cell RF | 550.0 Vpp | Set Divert Valve | Waste     |

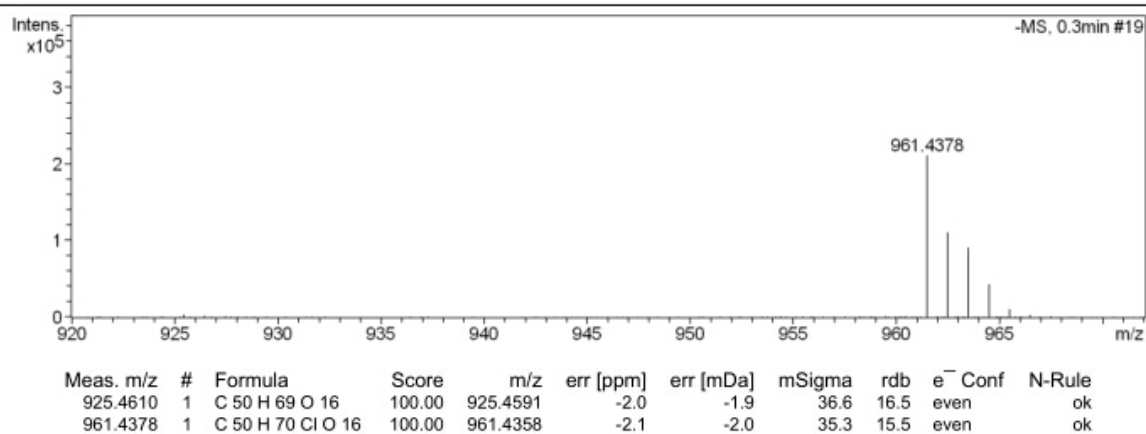

Figure S8. HR-ESIMS of compound 2.

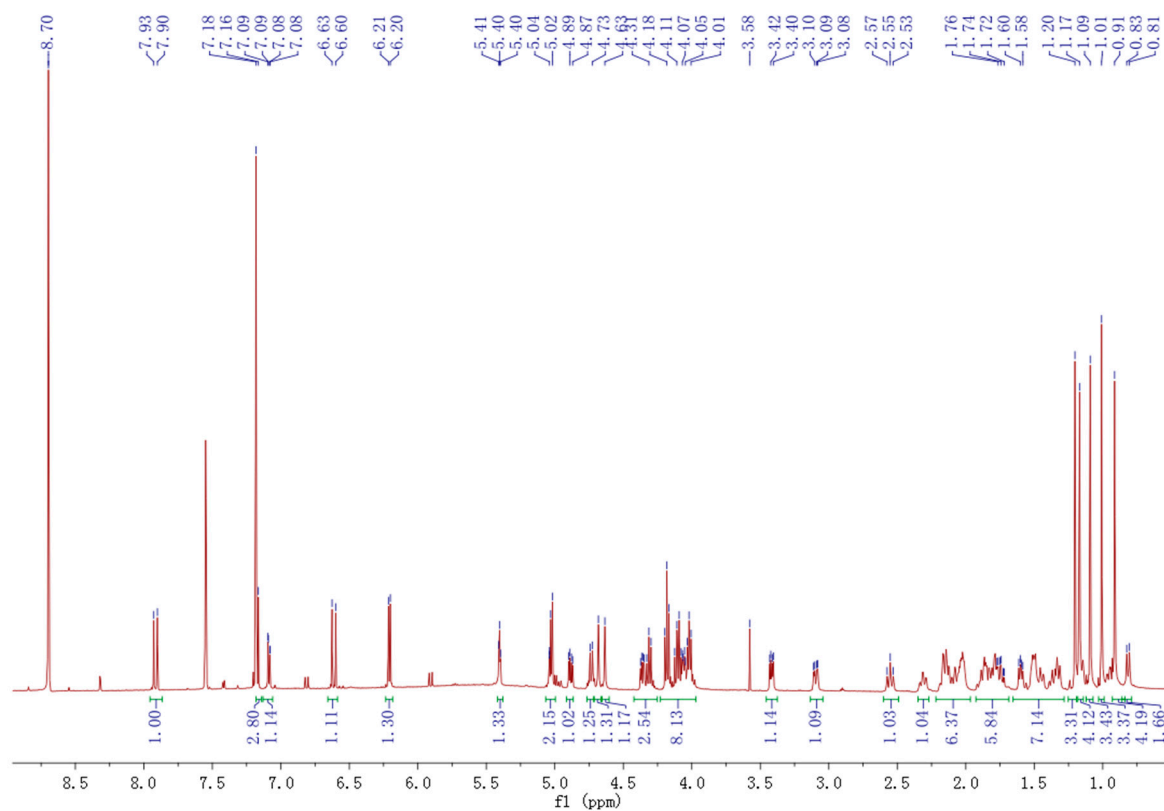Figure S9. <sup>1</sup>H-NMR of compound 2.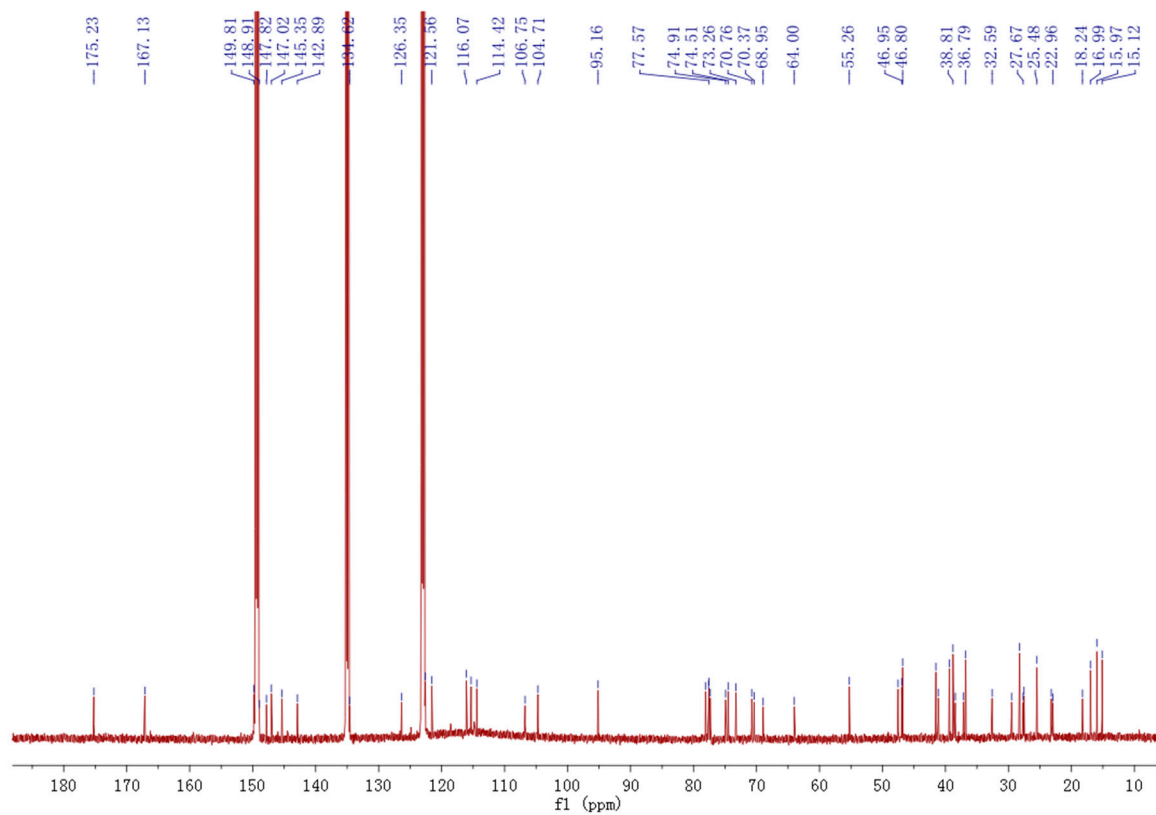Figure S10. <sup>13</sup>C-NMR of compound 2.

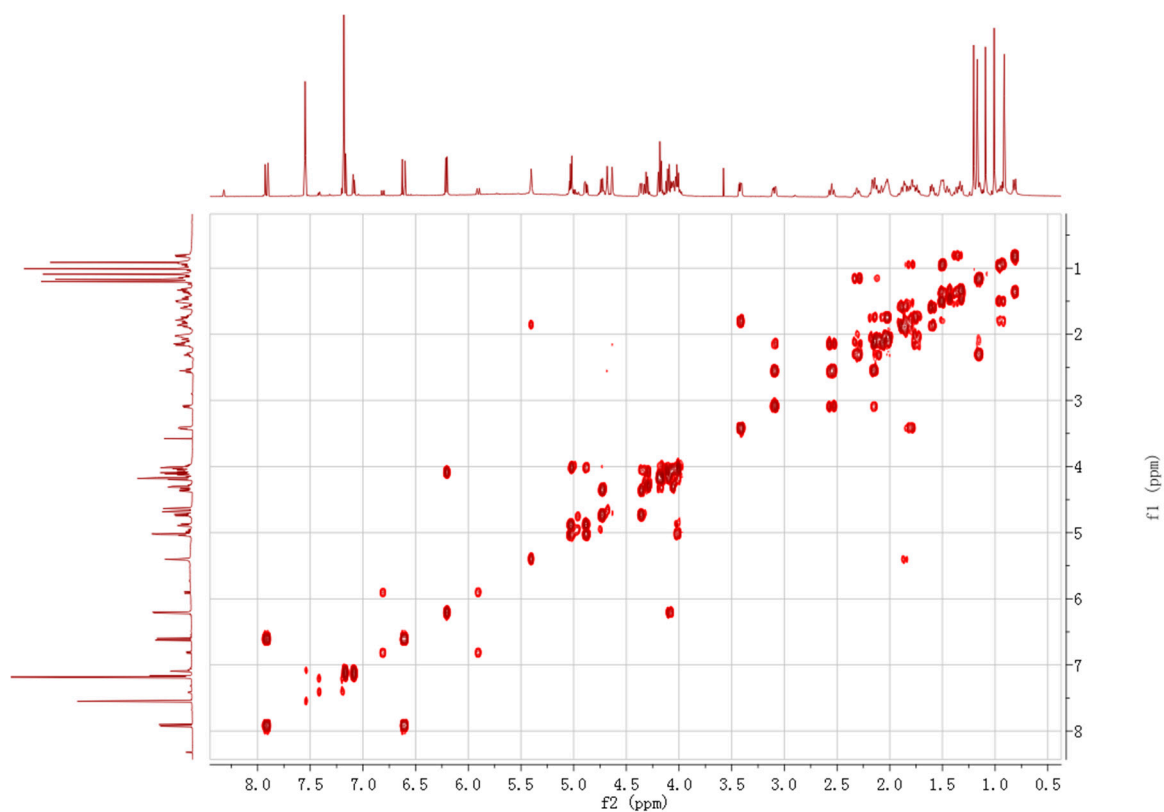

Figure S11.  $^1\text{H}$ - $^1\text{H}$  COSY of compound 2.

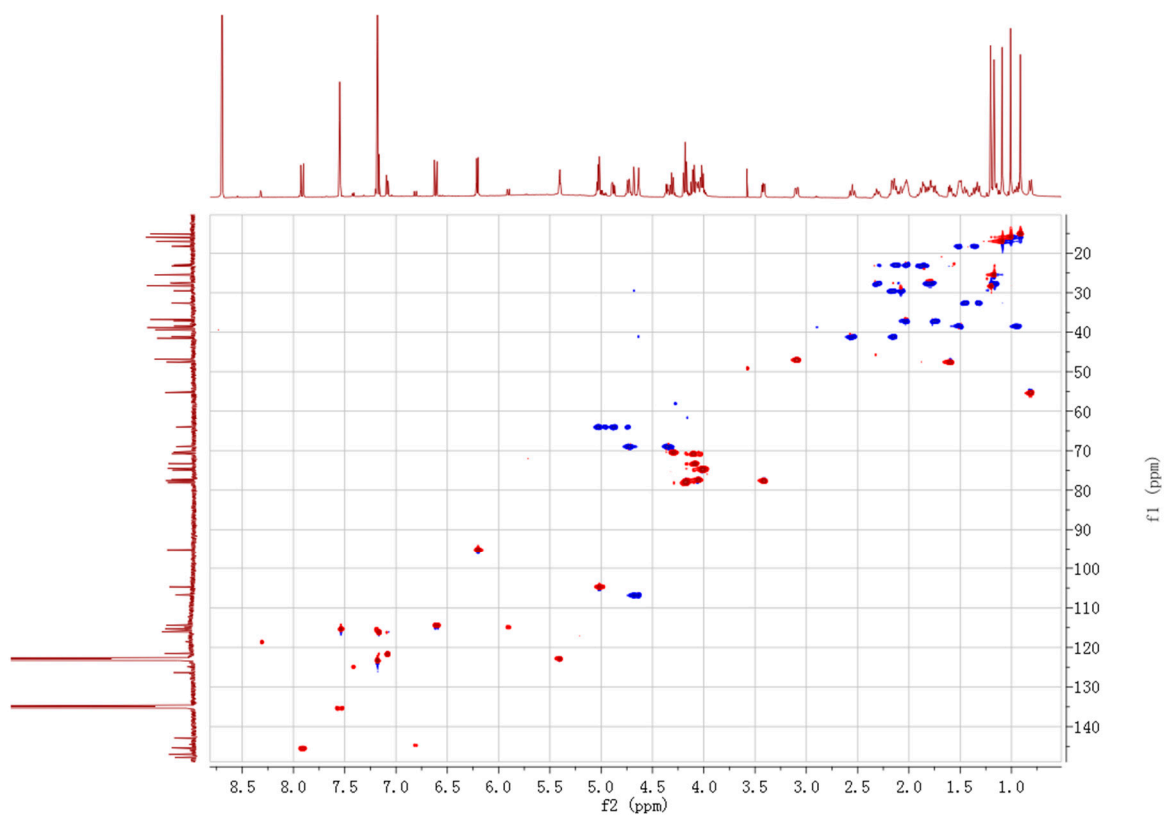

Figure S12. HSQC of compound 2.

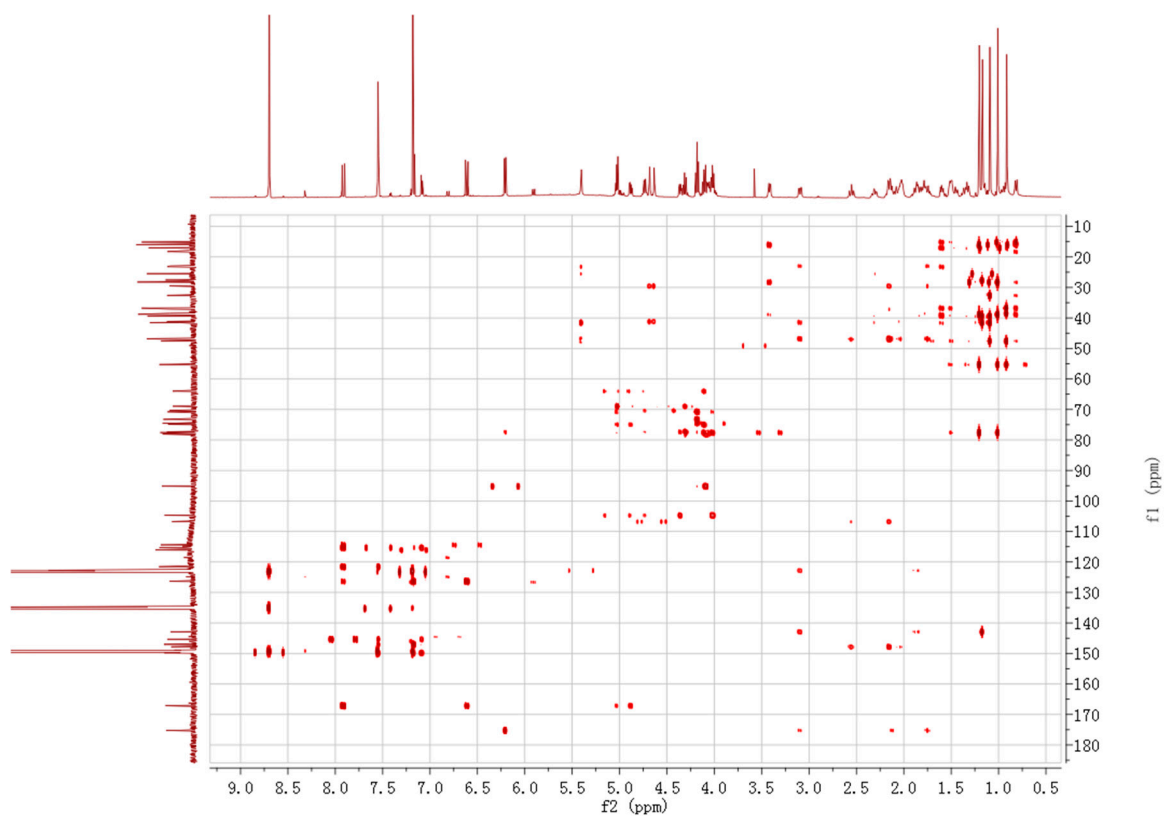

Figure S13. HMBC of compound 2.

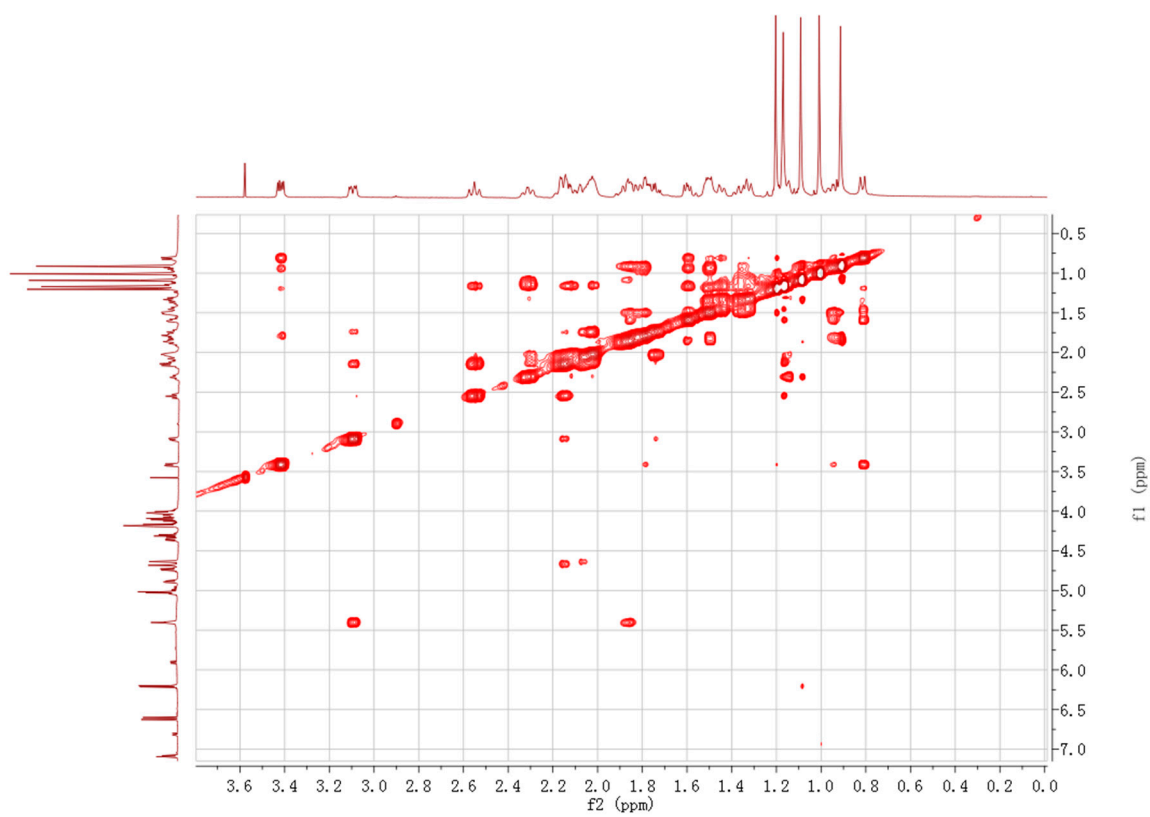

Figure S14. NOESY of compound 2.

**Acquisition Parameter**

|             |          |                       |           |                  |           |
|-------------|----------|-----------------------|-----------|------------------|-----------|
| Source Type | ESI      | Ion Polarity          | Negative  | Set Nebulizer    | 0.4 Bar   |
| Focus       | Active   | Set Capillary         | 3800 V    | Set Dry Heater   | 180 °C    |
| Scan Begin  | 100 m/z  | Set End Plate Offset  | -500 V    | Set Dry Gas      | 4.0 l/min |
| Scan End    | 2000 m/z | Set Collision Cell RF | 550.0 Vpp | Set Divert Valve | Waste     |

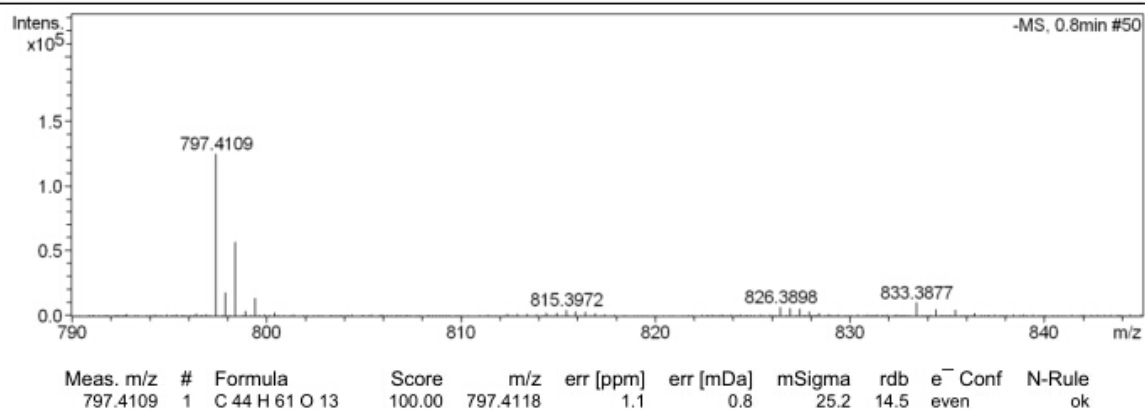

Figure S15. HR-ESIMS of compound 3.

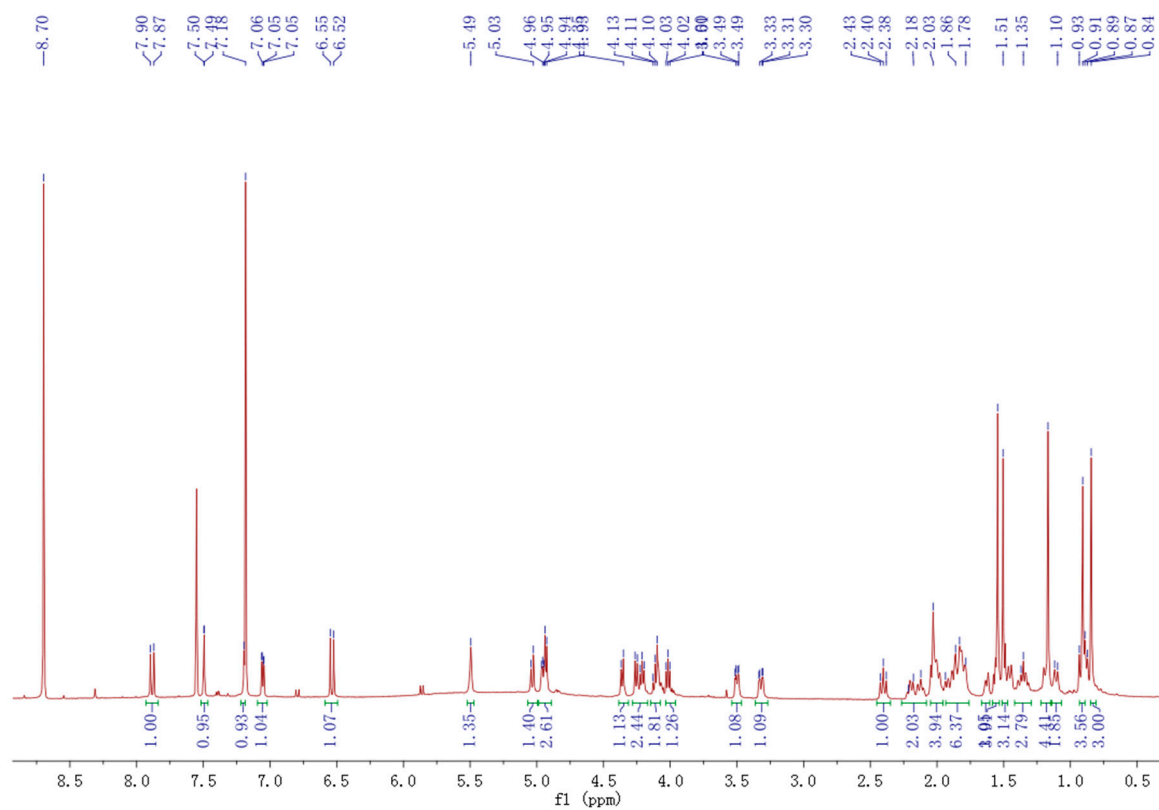Figure S16. <sup>1</sup>H-NMR of compound 3.



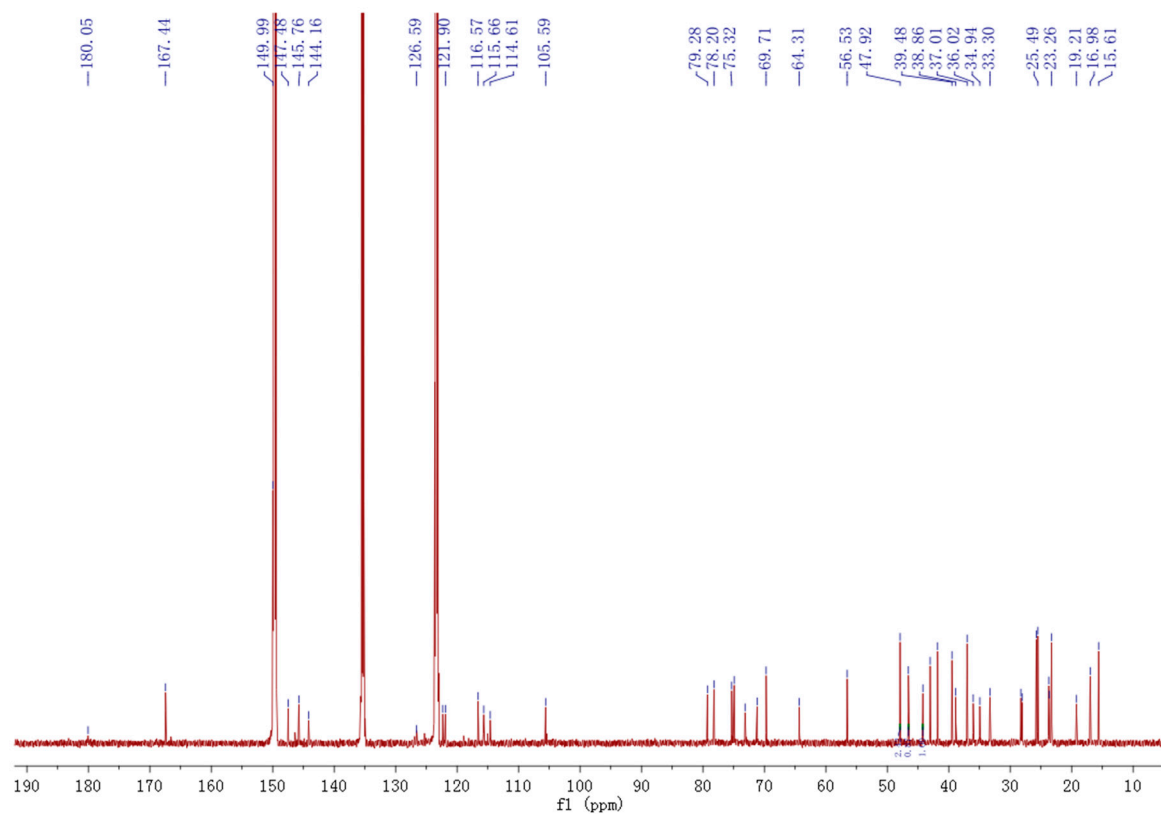Figure S17. <sup>13</sup>C-NMR of compound 3.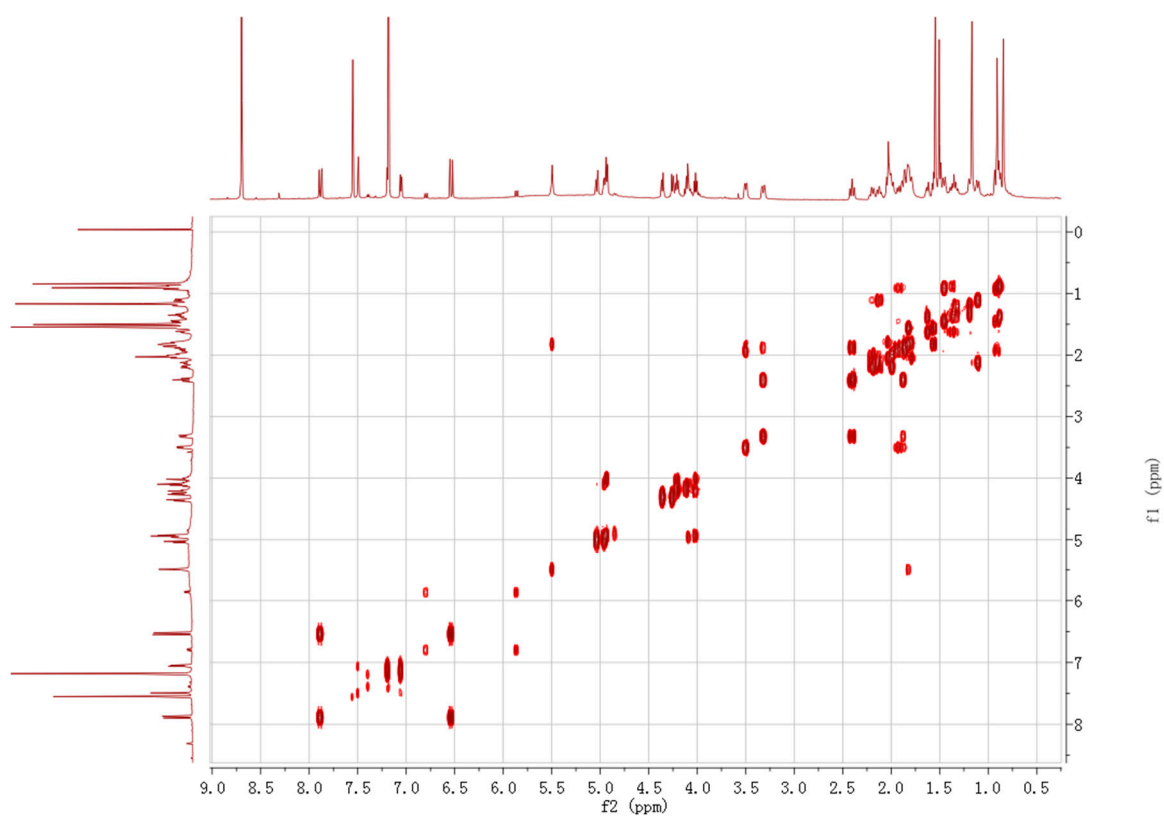Figure S18. <sup>1</sup>H-<sup>1</sup>H COSY of compound 3.

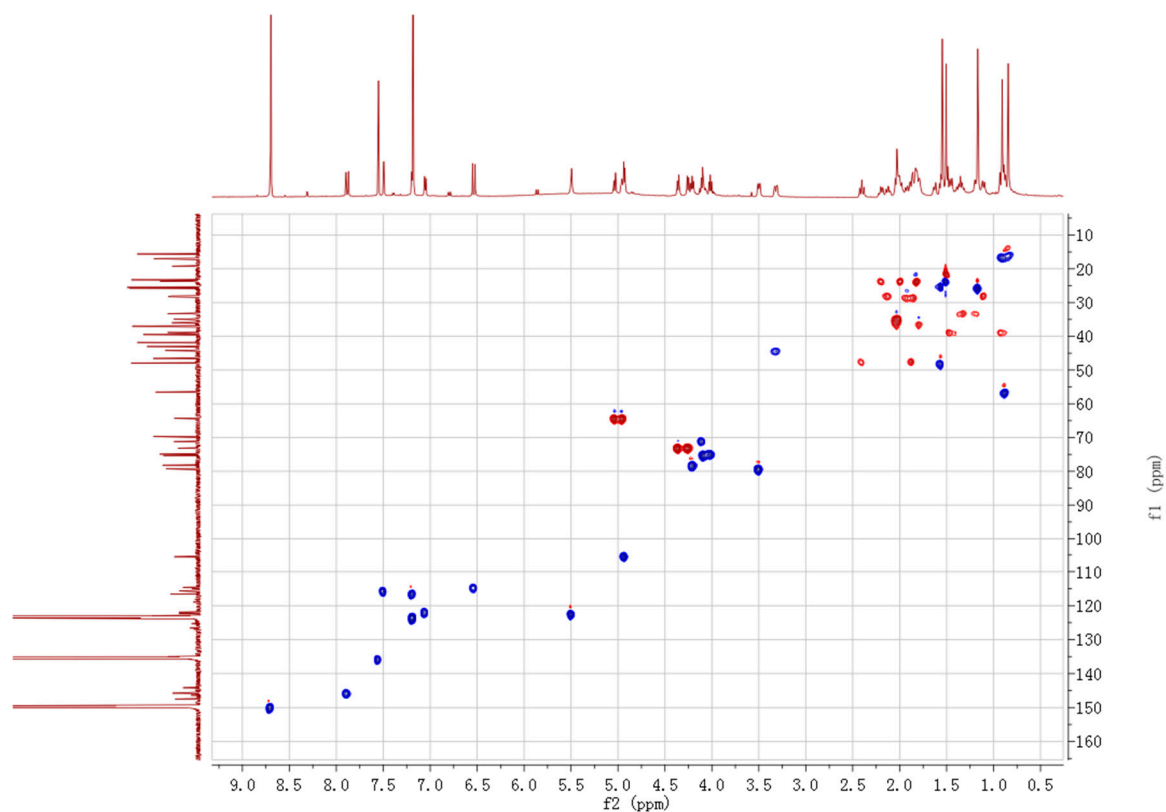

Figure S19. HSQC of compound 3.

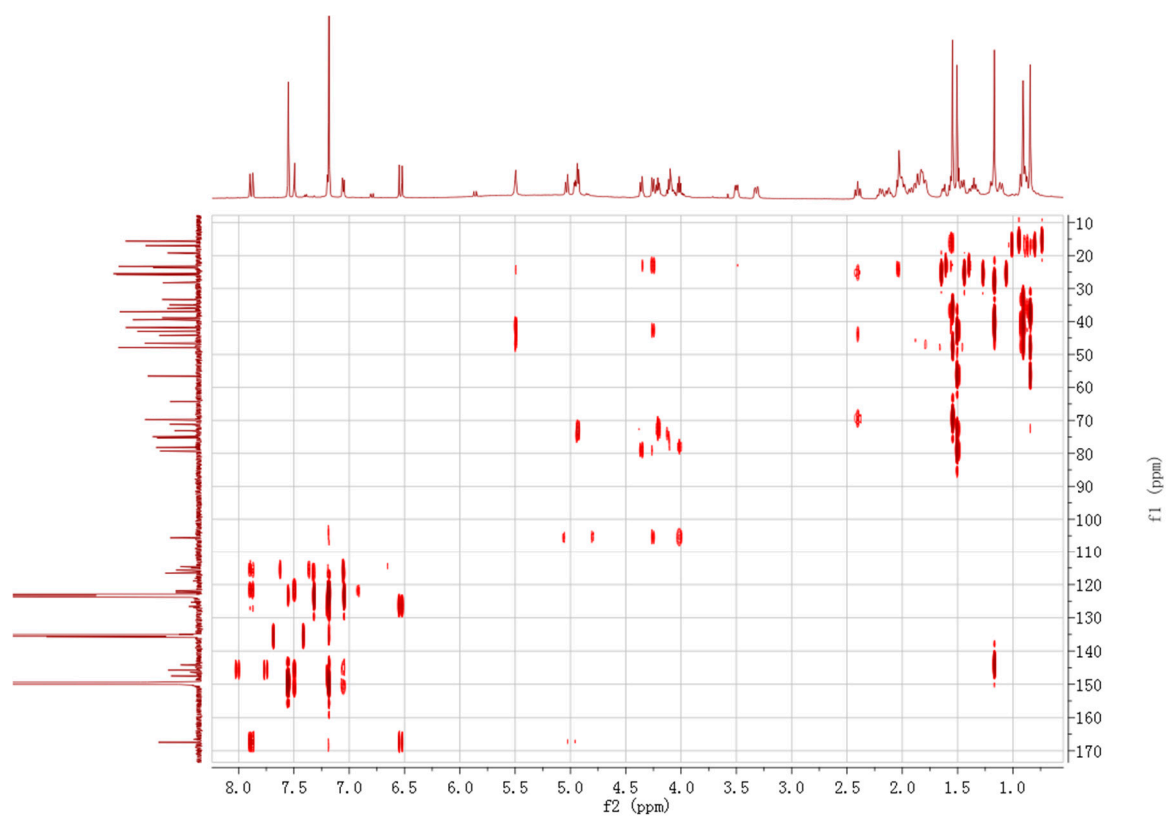

Figure S20. HMBC of compound 3.

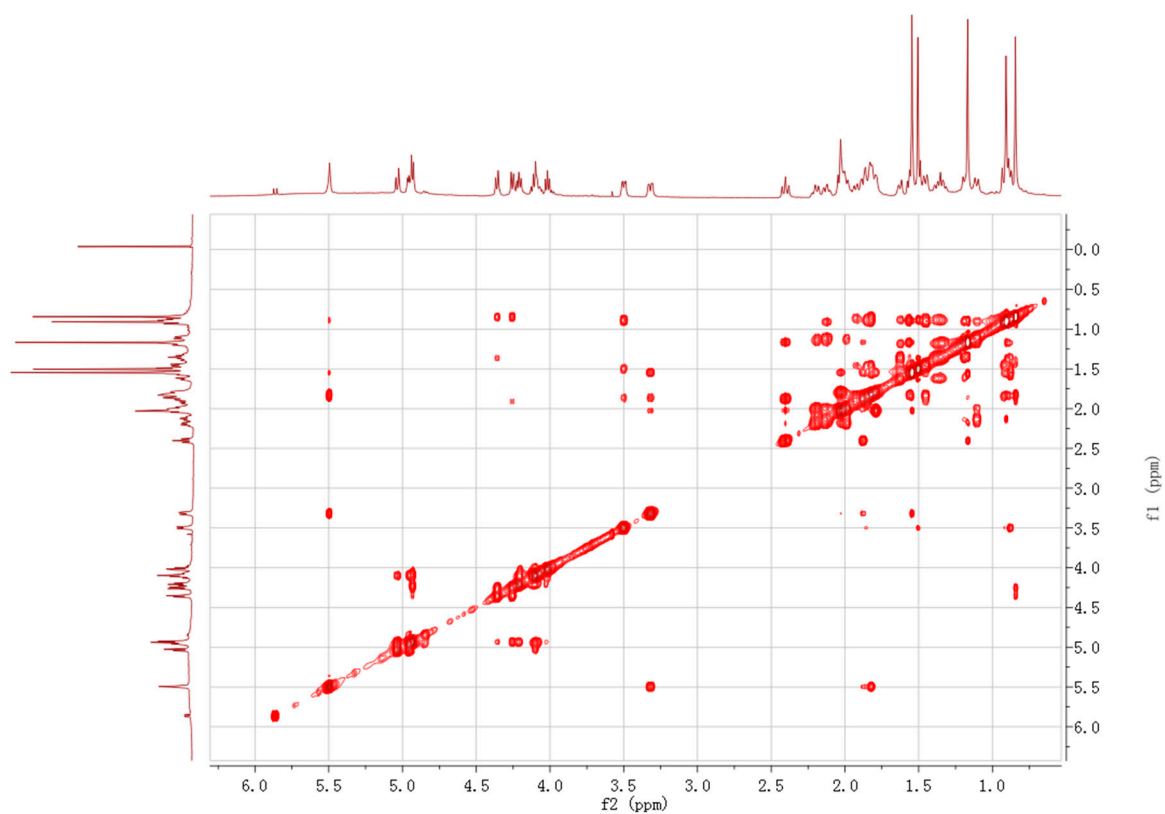

Figure S21. NOESY of compound 3.
